# Supplementary material for: Night Shift Work Affects Urine Metabolite Profiles of Nurses with Early Chronotype
Source: PubMed Central journal article supplement (PMC6161245; doi:10.3390/metabo8030045), 2018-08-21
Supplement: metabolites-08-00045-s001.pdf [file metabolites-08-00045-s001.pdf]

## Supplementary material

Figure S1. Correlation plot for age and chronotype value

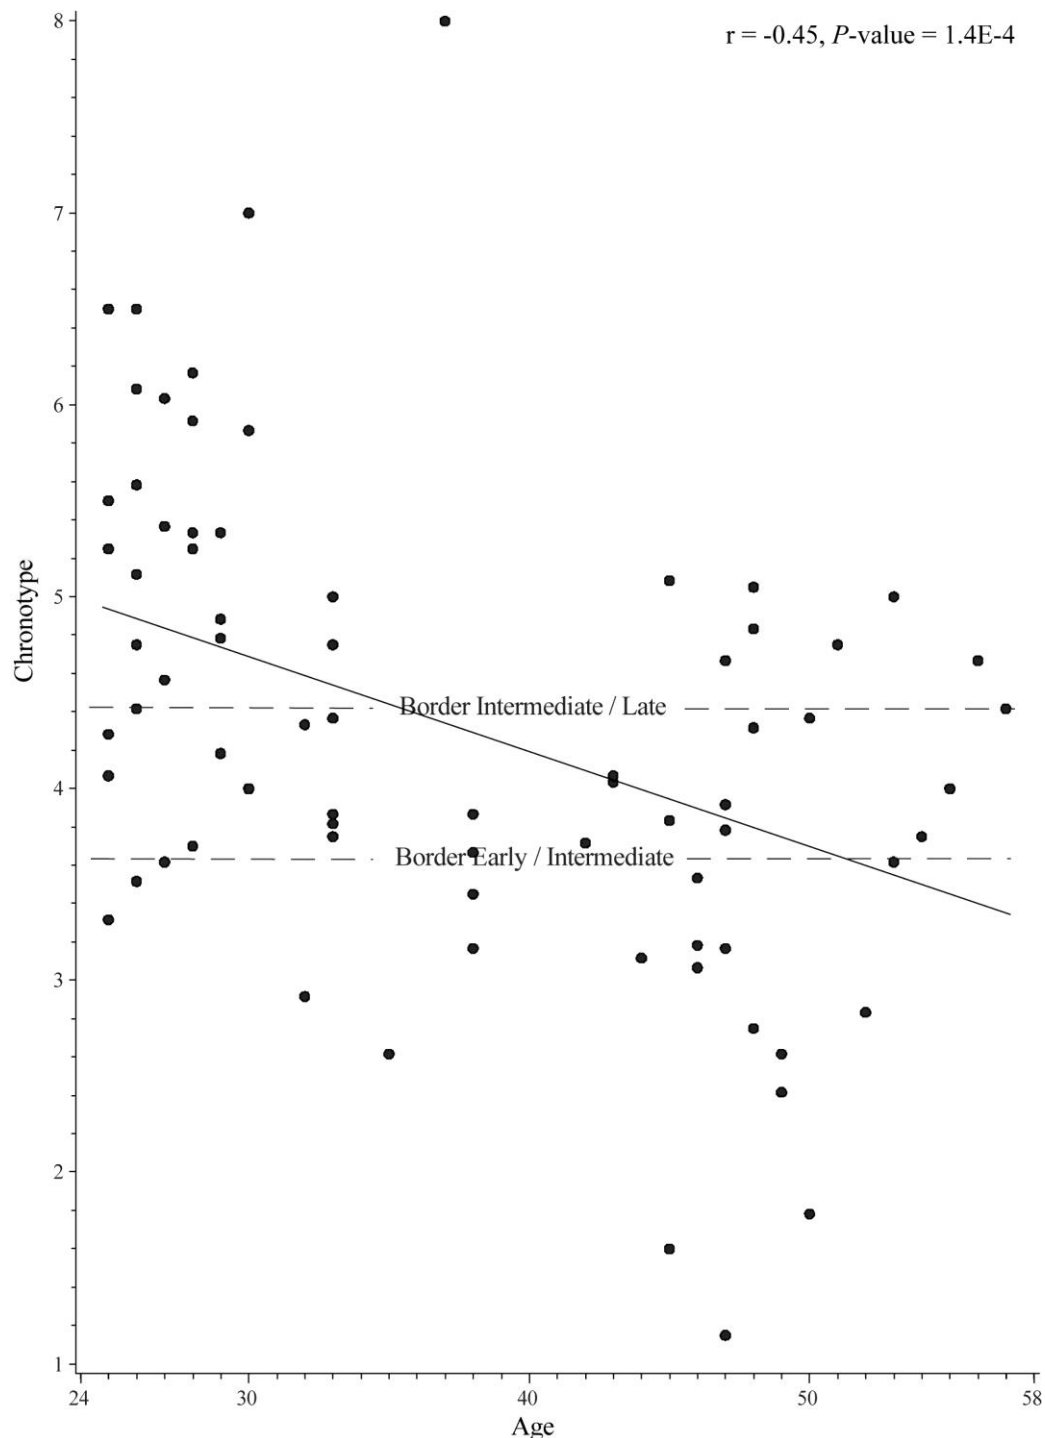

Pearson correlation plot between age and chronotype for nurses doing both day and night shifts (solid black dots) (N=68). Dashed lines indicate the separation into the strata early and intermediate (border early / intermediate) and intermediate and late (border intermediate / late) chronotypes. The continuous line represents the regression line (equation: chronotype value =  $6.3522243889 - 0.053634583 \cdot \text{age}$ ).

**Table S1. List of 162 quantified metabolites**

The first column shows the name of the metabolite. Application indicates if the respective metabolite passed the quality controls and whether it was included or excluded from further analysis. The third to eighth column illustrate the percentage of concentrations of all samples in both batches below the limit of detection (LOD), their coefficient of variance (CV) and mean concentrations with standard deviation (SD).

| Metabolites                 | Application | Measurement batch 1        |        |                              | Measurement batch 2        |        |                              |
|-----------------------------|-------------|----------------------------|--------|------------------------------|----------------------------|--------|------------------------------|
|                             |             | Measurements below LOD (%) | CV (%) | Mean concentration (SD) (µM) | Measurements below LOD (%) | CV (%) | Mean concentration (SD) (µM) |
| <b>Acylcarnitines</b>       |             |                            |        |                              |                            |        |                              |
| C0                          | Used        | 2.9                        | 14.7   | 45.48 ( 52.244)              | 2.9                        | 7.4    | 55.730 (56.108)              |
| C2                          | Used        | 0.1                        | 16.3   | 16.509 ( 22.147)             | 0.0                        | 7.6    | 17.939 (20.426)              |
| C3                          | Used        | 1.3                        | 15.4   | 0.695 ( 0.725)               | 1.5                        | 7.8    | 0.932 (0.826)                |
| C3:OH                       | Excluded    | 2.9                        | 25.0   | 0.66 ( 0.473)                | 53.2                       | 18.0   | 0.059 (0.058)                |
| C3:1                        | Excluded    | 62.0                       | 28.9   | 0.05 ( 0.044)                | 28.8                       | 16.8   | 0.021 (0.011)                |
| C4                          | Excluded    | 59.9                       | 454.0  | 0.085 ( 0.522)               | 0.0                        | 6.8    | 5.108 (4.025)                |
| (C3-DC)C4-OH                | Excluded    | 1.7                        | 52.5   | 0.186 ( 0.173)               | 2.4                        | 9.5    | 0.946 (0.646)                |
| C4:1                        | Used        | 0.7                        | 24.8   | 5.136 ( 4.268)               | 2.4                        | 9.1    | 0.164 (0.141)                |
| C5                          | Used        | 0.6                        | 16.0   | 0.195 ( 0.147)               | 2.0                        | 7.6    | 0.237 (0.203)                |
| C5-DC (C6-OH)               | Excluded    | 1.8                        | 54.7   | 0.596 ( 0.738)               | 1.5                        | 8.5    | 2.121 (1.587)                |
| C5-M-DC                     | Used        | 0.3                        | 23.4   | 1.825 ( 1.691)               | 1.0                        | 10.9   | 0.624 (0.494)                |
| C5-OH (C3-DC-M)             | Excluded    | 0.3                        | 48.0   | 0.428 ( 0.318)               | 2.4                        | 10.4   | 1.100 (3.589)                |
| C5:1                        | Used        | 0.7                        | 22.7   | 0.579 ( 1.647)               | 2.4                        | 8.5    | 1.048 (0.701)                |
| C5:1-DC                     | Used        | 0.5                        | 19.7   | 0.754 ( 0.546)               | 2.4                        | 9.9    | 0.310 (0.219)                |
| C6 (C4:1-DC)                | Excluded    | 0.8                        | 27.9   | 0.246 ( 0.2)                 | 2.4                        | 9.2    | 0.613 (0.582)                |
| C6:1                        | Used        | 11.8                       | 15.4   | 0.141 ( 0.104)               | 5.9                        | 11.4   | 0.139 (0.116)                |
| C7-DC                       | Used        | 1.6                        | 15.0   | 0.253 ( 0.229)               | 2.4                        | 10.3   | 0.235 (0.226)                |
| C8                          | Used        | 15.3                       | 13.9   | 0.456 ( 0.318)               | 10.2                       | 11.4   | 0.453 (0.415)                |
| C8:1                        | Used        | 0.1                        | 17.3   | 3.561 ( 4.197)               | 0.5                        | 10.8   | 3.013 (3.662)                |
| C9                          | Used        | 0.1                        | 15.1   | 2.913 ( 3.016)               | 0.0                        | 6.0    | 2.772 (2.642)                |
| C10                         | Used        | 16.0                       | 13.7   | 0.235 ( 0.149)               | 7.8                        | 6.8    | 0.284 (0.223)                |
| C10:1                       | Used        | 0.3                        | 16.4   | 0.812 ( 0.661)               | 2.0                        | 6.4    | 0.834 (0.627)                |
| C10:2                       | Used        | 0.1                        | 18.7   | 1.443 ( 3.603)               | 1.0                        | 5.9    | 1.052 (1.449)                |
| C12                         | Used        | 10.6                       | 13.0   | 0.259 ( 0.178)               | 5.4                        | 6.8    | 0.296 (0.215)                |
| C12:DC                      | Excluded    | 99.8                       | 8.6    | 0.173 ( 0.074)               | 99.5                       | 6.3    | 0.127 (0.038)                |
| C12:1                       | Excluded    | 73.7                       | 13.4   | 0.259 ( 0.164)               | 51.2                       | 7.3    | 0.271 (0.168)                |
| C14                         | Used        | 49.2                       | 14.5   | 0.025 ( 0.018)               | 35.1                       | 8.1    | 0.038 (0.049)                |
| C14:1                       | Used        | 24.4                       | 17.3   | 0.015 ( 0.013)               | 14.6                       | 14.1   | 0.025 (0.029)                |
| C14:1-OH                    | Used        | 39.3                       | 15.2   | 0.016 ( 0.012)               | 20.5                       | 10.7   | 0.020 (0.022)                |
| C14:2                       | Used        | 22.5                       | 16.5   | 0.014 ( 0.012)               | 7.3                        | 12.7   | 0.022 (0.026)                |
| C14:2-OH                    | Used        | 31.9                       | 16.9   | 0.013 ( 0.009)               | 22.0                       | 12.5   | 0.018 (0.019)                |
| C16                         | Used        | 36.2                       | 21.6   | 0.04 ( 0.21)                 | 29.3                       | 9.7    | 0.077 (0.469)                |
| C16:OH                      | Used        | 47.5                       | 22.5   | 0.031 ( 0.179)               | 14.6                       | 10.2   | 0.076 (0.401)                |
| C16:1                       | Excluded    | 99.7                       | 11.8   | 0.041 ( 0.014)               | 99.5                       | 10.0   | 0.063 (0.025)                |
| C16:1-OH                    | Excluded    | 69.3                       | 19.6   | 0.007 ( 0.004)               | 51.7                       | 17.1   | 0.009 (0.010)                |
| C16:2                       | Used        | 37.9                       | 22.1   | 0.01 ( 0.007)                | 22.4                       | 10.7   | 0.013 (0.009)                |
| C16:2-OH                    | Excluded    | 90.9                       | 22.7   | 0.01 ( 0.003)                | 94.1                       | 13.1   | 0.014 (0.006)                |
| C18                         | Excluded    | 73.3                       | 22.2   | 0.006 ( 0.004)               | 68.8                       | 14.6   | 0.009 (0.008)                |
| C18:1                       | Excluded    | 91.7                       | 17.8   | 0.007 ( 0.003)               | 91.2                       | 19.1   | 0.008 (0.003)                |
| C18:1-OH                    | Excluded    | 98.0                       | 18.2   | 0.009 ( 0.002)               | 99.5                       | 11.4   | 0.012 (0.003)                |
| C18:2                       | Used        | 44.7                       | 22.5   | 0.005 ( 0.003)               | 48.3                       | 9.2    | 0.006 (0.004)                |
| <b>Amino acids</b>          |             |                            |        |                              |                            |        |                              |
| Arg                         | Used        | 15.5                       | 21.3   | 15.165 ( 12.555)             | 4.9                        | 9.6    | 17.480 (14.599)              |
| Gln                         | Used        | 0.1                        | 18.6   | 251.184 ( 227.606)           | 0.0                        | 5.9    | 258.361 (173.577)            |
| Gly                         | Used        | 0.1                        | 19.2   | 771.854 ( 748.743)           | 0.0                        | 8.0    | 897.190 (1185.140)           |
| His                         | Used        | 0.1                        | 18.4   | 367.353 ( 397.542)           | 0                          | 7.8    | 315.812 (228.959)            |
| Met                         | Used        | 2.8                        | 20.8   | 9.393 ( 6.659)               | 3.4                        | 12.7   | 9.373 (6.106)                |
| Phe                         | Used        | 0.1                        | 16.1   | 18.527 ( 16.473)             | 0                          | 5.8    | 19.804 (12.093)              |
| Pro                         | Used        | 0.5                        | 17.9   | 16.972 ( 13.35)              | 2.4                        | 9.4    | 15.162 (12.098)              |
| Ser                         | Used        | 0.1                        | 19.7   | 180.859 ( 166.863)           | 1.0                        | 17.9   | 179.772 (123.364)            |
| Thr                         | Used        | 0.1                        | 20.9   | 78.284 ( 81.509)             | 1.5                        | 18.6   | 67.670 (49.736)              |
| Trp                         | Used        | 8.2                        | 16.5   | 44.342 ( 38.189)             | 3.9                        | 6.9    | 52.080 (33.292)              |
| Tyr                         | Used        | 0.1                        | 17.8   | 64.432 ( 68.57)              | 2.0                        | 7.6    | 66.398 (50.392)              |
| Val                         | Used        | 0.2                        | 19.1   | 27.398 ( 22.034)             | 2.4                        | 6.9    | 26.581 (17.557)              |
| Leu/Isoleu                  | Used        | 0.1                        | 19.7   | 43.022 ( 39.313)             | 2.4                        | 7.1    | 43.256 (33.167)              |
| Creatinine                  | Used        | 0.1                        | 14.9   | 7000.62 ( 39818.44)          | 0                          | 6.0    | 6644.470 (5104.090)          |
| <b>Phosphatidylcholines</b> |             |                            |        |                              |                            |        |                              |
| PC aa C24:0                 | Excluded    | 99.8                       | 32.5   | 0.016 ( 0.008)               | 99.0                       | 14.2   | 0.019 (0.036)                |
| PC aa C26:0                 | Excluded    | 100.0                      | 3.5    | 0.397 ( 0.016)               | 100.0                      | 3.2    | 0.398 (0.017)                |
| PC aa C28:1                 | Excluded    | 89.5                       | 26.1   | 0.058 ( 0.03)                | 22.0                       | 13.1   | 0.062 (0.038)                |
| PC aa C30:0                 | Excluded    | 99.9                       | 9.9    | 0.051 ( 0.009)               | 100.0                      | 6.4    | 0.051 (0.010)                |

|             |          |       |       |               |       |       |               |
|-------------|----------|-------|-------|---------------|-------|-------|---------------|
| PC aa C30:2 | Excluded | 44.9  | 63.7  | 0.002 (0.003) | 25.9  | 57.6  | 0.002 (0.002) |
| PC aa C32:0 | Excluded | 80.5  | 26.1  | 0.016 (0.022) | 70.7  | 9.7   | 0.013 (0.017) |
| PC aa C32:1 | Excluded | 70.4  | 43.1  | 0.009 (0.016) | 74.1  | 32.6  | 0.007 (0.015) |
| PC aa C32:2 | Excluded | 76.8  | 61.3  | 0.002 (0.003) | 77.1  | 47.8  | 0.002 (0.004) |
| PC aa C32:3 | Excluded | 98.2  | 51.3  | 0.002 (0.001) | 74.1  | 53.9  | 0.002 (0.001) |
| PC aa C34:1 | Excluded | 23.2  | 40.8  | 0.08 (0.136)  | 11.7  | 16.7  | 0.078 (0.203) |
| PC aa C34:2 | Excluded | 79.2  | 60.4  | 0.062 (0.23)  | 17.1  | 30.3  | 0.073 (0.419) |
| PC aa C34:3 | Excluded | 98.5  | 39.2  | 0.006 (0.01)  | 96.1  | 28.8  | 0.004 (0.012) |
| PC aa C34:4 | Excluded | 91.8  | 30.1  | 0.007 (0.005) | 69.3  | 25.7  | 0.006 (0.009) |
| PC aa C36:0 | Excluded | 100.0 | 15.0  | 0.053 (0.006) | 100.0 | 8.8   | 0.045 (0.005) |
| PC aa C36:1 | Excluded | 21.7  | 35.4  | 0.035 (0.042) | 14.6  | 21.2  | 0.037 (0.062) |
| PC aa C36:2 | Excluded | 32.3  | 62.2  | 0.045 (0.119) | 26.8  | 26.8  | 0.055 (0.248) |
| PC aa C36:3 | Excluded | 32.4  | 50.8  | 0.026 (0.083) | 15.1  | 20.9  | 0.030 (0.135) |
| PC aa C36:4 | Excluded | 48.5  | 73.4  | 0.024 (0.094) | 26.3  | 26.8  | 0.032 (0.192) |
| PC aa C36:5 | Excluded | 95.7  | 45.7  | 0.004 (0.008) | 93.7  | 30.8  | 0.004 (0.014) |
| PC aa C36:6 | Excluded | 32.4  | 84.3  | 0.002 (0.002) | 26.3  | 43.1  | 0.003 (0.003) |
| PC aa C38:0 | Excluded | 99.7  | 23.3  | 0.014 (0.004) | 98.5  | 15.2  | 0.012 (0.005) |
| PC aa C38:1 | Excluded | 86.6  | 65.6  | 0.004 (0.004) | 83.4  | 68.6  | 0.005 (0.004) |
| PC aa C38:3 | Excluded | 64.5  | 55.4  | 0.009 (0.024) | 37.6  | 41.2  | 0.012 (0.045) |
| PC aa C38:4 | Excluded | 43.4  | 66.1  | 0.017 (0.049) | 24.9  | 59    | 0.022 (0.118) |
| PC aa C38:5 | Excluded | 68.3  | 59.0  | 0.007 (0.019) | 62.9  | 58.7  | 0.010 (0.045) |
| PC aa C38:6 | Excluded | 45.5  | 51.9  | 0.011 (0.025) | 18.5  | 36.3  | 0.013 (0.049) |
| PC aa C40:1 | Excluded | 100.0 | 21.0  | 0.163 (0.033) | 100.0 | 7.9   | 0.132 (0.014) |
| PC aa C40:2 | Excluded | 99.9  | 26.2  | 0.01 (0.003)  | 98.5  | 26.4  | 0.009 (0.003) |
| PC aa C40:3 | Excluded | 94.6  | 45.9  | 0.002 (0.002) | 74.6  | 40    | 0.003 (0.002) |
| PC aa C40:4 | Excluded | 99.6  | 30.3  | 0.005 (0.002) | 98.5  | 27.1  | 0.006 (0.005) |
| PC aa C40:5 | Excluded | 92.8  | 315.1 | 0 (0.004)     | 92.2  | 387.3 | 0.001 (0.011) |
| PC aa C40:6 | Excluded | 99.9  | 9.9   | 0.074 (0.01)  | 99.0  | 4.8   | 0.077 (0.019) |
| PC aa C42:0 | Excluded | 100.0 | 15.5  | 0.025 (0.006) | 100.0 | 13.2  | 0.025 (0.008) |
| PC aa C42:1 | Excluded | 100.0 | 38.8  | 0.008 (0.003) | 100.0 | 36.1  | 0.007 (0.002) |
| PC aa C42:2 | Excluded | 100.0 | 11.8  | 0.037 (0.005) | 100.0 | 10.8  | 0.033 (0.004) |
| PC aa C42:4 | Excluded | 95.4  | 40.5  | 0.004 (0.002) | 100.0 | 54.6  | 0.004 (0.002) |
| PC aa C42:5 | Excluded | 98.4  | 38.4  | 0.009 (0.004) | 78.0  | 50.1  | 0.006 (0.003) |
| PC aa C42:6 | Excluded | 100.0 | 27.4  | 0.099 (0.028) | 100.0 | 14.4  | 0.098 (0.020) |
| PC ae C30:0 | Excluded | 100.0 | 21.9  | 0.053 (0.011) | 100.0 | 9.6   | 0.042 (0.006) |
| PC ae C30:1 | Excluded | 98.6  | 46.5  | 0.006 (0.003) | 36.6  | 137.1 | 0.002 (0.003) |
| PC ae C30:2 | Excluded | 99.9  | 13.3  | 0.025 (0.006) | 100.0 | 5.6   | 0.109 (0.009) |
| PC ae C32:1 | Excluded | 63.9  | 44.0  | 0.005 (0.006) | 63.4  | 34.5  | 0.004 (0.007) |
| PC ae C32:2 | Excluded | 100.0 | 19.7  | 0.012 (0.004) | 100.0 | 21.6  | 0.008 (0.003) |
| PC ae C34:0 | Excluded | 97.8  | 28.8  | 0.008 (0.004) | 93.2  | 24.9  | 0.006 (0.004) |
| PC ae C34:1 | Excluded | 68.1  | 23.3  | 0.015 (0.019) | 61.0  | 21.5  | 0.013 (0.018) |
| PC ae C34:2 | Excluded | 51.6  | 42.6  | 0.006 (0.012) | 19.5  | 31.6  | 0.006 (0.012) |
| PC ae C34:3 | Excluded | 92.2  | 41.3  | 0.006 (0.005) | 63.9  | 33.4  | 0.005 (0.008) |
| PC ae C36:0 | Excluded | 100.0 | 14.6  | 0.046 (0.019) | 100.0 | 10.8  | 0.038 (0.015) |
| PC ae C36:1 | Excluded | 99.8  | 26.7  | 0.034 (0.013) | 98.0  | 18.2  | 0.023 (0.014) |
| PC ae C36:2 | Excluded | 95.8  | 19.5  | 0.017 (0.013) | 95.1  | 18.6  | 0.015 (0.012) |
| PC ae C36:3 | Excluded | 93.8  | 48.3  | 0.005 (0.006) | 65.9  | 29    | 0.004 (0.007) |
| PC ae C36:4 | Excluded | 64.9  | 29.3  | 0.011 (0.009) | 73.7  | 31.1  | 0.009 (0.014) |
| PC ae C36:5 | Excluded | 98.9  | 36.4  | 0.006 (0.006) | 93.2  | 20.3  | 0.007 (0.015) |
| PC ae C38:0 | Excluded | 100.0 | 9.6   | 0.051 (0.007) | 100.0 | 5.9   | 0.045 (0.008) |
| PC ae C38:1 | Excluded | 91.0  | 72.6  | 0.002 (0.003) | 93.2  | 93.7  | 0.002 (0.004) |
| PC ae C38:2 | Excluded | 74.8  | 56.2  | 0.004 (0.004) | 75.1  | 50    | 0.004 (0.005) |
| PC ae C38:3 | Used     | 48.5  | 23.5  | 0.017 (0.009) | 32.7  | 18.0  | 0.021 (0.016) |
| PC ae C38:4 | Excluded | 48.5  | 62.7  | 0.004 (0.007) | 42.4  | 41.6  | 0.005 (0.012) |
| PC ae C38:5 | Excluded | 100.0 | 15.2  | 0.103 (0.031) | 100.0 | 14.6  | 0.106 (0.056) |
| PC ae C38:6 | Used     | 0.8   | 19.7  | 0.052 (0.035) | 1.5   | 12.9  | 0.053 (0.035) |
| PC ae C40:1 | Excluded | 99.4  | 29.7  | 0.007 (0.003) | 98.0  | 35.8  | 0.007 (0.003) |
| PC ae C40:2 | Excluded | 58.4  | 34.0  | 0.005 (0.004) | 52.7  | 27.1  | 0.005 (0.004) |
| PC ae C40:3 | Excluded | 87.4  | 75.7  | 0.002 (0.003) | 48.8  | 92.7  | 0.003 (0.006) |
| PC ae C40:4 | Excluded | 99.9  | 12.6  | 0.029 (0.005) | 99.5  | 12.2  | 0.030 (0.009) |
| PC ae C40:5 | Excluded | 88.2  | 66.6  | 0.003 (0.003) | 91.7  | 41.8  | 0.003 (0.007) |
| PC ae C40:6 | Excluded | 99.4  | 40.1  | 0.005 (0.003) | 98.0  | 38.2  | 0.005 (0.004) |
| PC ae C42:0 | Excluded | 100.0 | 6.0   | 0.478 (0.03)  | 100.0 | 3.5   | 0.418 (0.022) |
| PC ae C42:1 | Excluded | 100.0 | 12.1  | 0.054 (0.007) | 100.0 | 7.6   | 0.045 (0.006) |
| PC ae C42:2 | Excluded | 99.3  | 31.5  | 0.006 (0.003) | 99.0  | 26.6  | 0.006 (0.002) |
| PC ae C42:3 | Excluded | 95.6  | 27.9  | 0.005 (0.003) | 96.6  | 27.2  | 0.005 (0.002) |
| PC ae C42:4 | Excluded | 99.9  | .     | 0 (0)         | 100.0 | .     | 0.000 (0.000) |
| PC ae C42:5 | Excluded | 100.0 | 4.8   | 0.256 (0.014) | 100.0 | 2.5   | 0.393 (0.019) |
| PC ae C44:3 | Excluded | 100.0 | 23.1  | 0.013 (0.003) | 100.0 | 23.0  | 0.013 (0.003) |
| PC ae C44:4 | Excluded | 100.0 | 11.2  | 0.038 (0.005) | 100.0 | 9.9   | 0.037 (0.004) |
| PC ae C44:5 | Excluded | 100.0 | 20.6  | 0.024 (0.006) | 100.0 | 27.9  | 0.022 (0.006) |
| PC ae C44:6 | Excluded | 100.0 | 17.7  | 0.02 (0.004)  | 100.0 | 18.6  | 0.020 (0.004) |
| PC a C14:0  | Excluded | 100.0 | 6.0   | 1.542 (0.124) | 100.0 | 4.3   | 1.993 (0.143) |
| PC a C16:0  | Excluded | 99.8  | 58.4  | 0.036 (0.049) | 99.0  | 22.0  | 0.075 (0.245) |
| PC a C16:1  | Excluded | 97.7  | 26.1  | 0.028 (0.01)  | 95.1  | 22.0  | 0.035 (0.016) |
| PC a C17:0  | Excluded | 70.8  | 33.1  | 0.023 (0.012) | 54.6  | 30.8  | 0.026 (0.014) |
| PC a C18:0  | Excluded | 99.9  | 26.8  | 0.082 (0.037) | 99.0  | 10.7  | 0.098 (0.162) |
| PC a C18:1  | Excluded | 94.7  | 44.3  | 0.027 (0.024) | 83.9  | 23.2  | 0.031 (0.071) |
| PC a C18:2  | Excluded | 83.5  | 54.6  | 0.023 (0.016) | 82.9  | 42.1  | 0.034 (0.058) |
| PC a C20:3  | Excluded | 99.0  | 21.2  | 0.053 (0.015) | 100.0 | 12.3  | 0.095 (0.020) |
| PC a C20:4  | Excluded | 54.5  | 41.0  | 0.012 (0.01)  | 28.8  | 49.3  | 0.015 (0.021) |
| PC a C24:0  | Excluded | 100.0 | 17.6  | 0.076 (0.015) | 100.0 | 6.3   | 0.276 (0.028) |
| PC a C26:0  | Excluded | 96.7  | 41.3  | 0.012 (0.007) | 86.8  | 35    | 0.011 (0.006) |
| PC a C26:1  | Excluded | 87.9  | 35.3  | 0.011 (0.006) | 87.3  | 32.6  | 0.013 (0.007) |
| PC a C28:0  | Excluded | 100.0 | 19.9  | 0.056 (0.013) | 100.0 | 14.1  | 0.059 (0.013) |
| PC a C28:1  | Excluded | 100.0 | 34.1  | 0.022 (0.016) | 100.0 | 40    | 0.029 (0.018) |

|                       |          |      |       |                    |      |       |                     |
|-----------------------|----------|------|-------|--------------------|------|-------|---------------------|
| PC a C6:0             | Excluded | 20.0 | 27.3  | 0.03 ( 0.018)      | 12.7 | 19.8  | 0.049 (0.029)       |
| <b>Sphingomyelins</b> |          |      |       |                    |      |       |                     |
| SM (OH) C14:1         | Excluded | 36.5 | 50.6  | 0.015 ( 0.011)     | 98.5 | .     | 0.000 (0.004)       |
| SM (OH) C16:1         | Excluded | 53.1 | 164.5 | 0.002 ( 0.004)     | 32.7 | 116.7 | 0.004 (0.008)       |
| SM (OH) C22:1         | Excluded | 15.7 | 33.4  | 0.024 ( 0.02)      | 16.1 | 21.2  | 0.033 (0.037)       |
| SM (OH) C22:2         | Excluded | 54.9 | 106.5 | 0.004 ( 0.007)     | 52.7 | 118.1 | 0.004 (0.013)       |
| SM (OH) C24:1         | Excluded | 46.8 | 69.0  | 0.005 ( 0.005)     | 36.6 | 47.4  | 0.008 (0.008)       |
| SM C16:0              | Excluded | 5.5  | 29.9  | 0.116 ( 0.139)     | 2.4  | 13.4  | 0.150 (0.272)       |
| SM C16:1              | Excluded | 42.8 | 39.3  | 0.01 ( 0.011)      | 13.2 | 33.4  | 0.014 (0.026)       |
| SM C18:0              | Excluded | 16.0 | 47.7  | 0.019 ( 0.02)      | 14.6 | 23.3  | 0.026 (0.043)       |
| SM C18:1              | Excluded | 44.7 | 67.3  | 0.004 ( 0.007)     | 42.9 | 49.7  | 0.006 (0.017)       |
| SM C20:2              | Excluded | 84.3 | 150.9 | 0.001 ( 0.002)     | 70.7 | 258.2 | 0.001 (0.002)       |
| SM C22:3              | Excluded | 69.4 | 88.8  | 0.003 ( 0.003)     | 75.1 | 80.8  | 0.003 (0.003)       |
| SM C24:0              | Used     | 4.0  | 24.8  | 0.057 ( 0.048)     | 2.4  | 21.7  | 0.078 (0.094)       |
| SM C24:1              | Excluded | 7.8  | 34.6  | 0.046 ( 0.055)     | 1.0  | 23.0  | 0.066 (0.108)       |
| SM C26:0              | Excluded | 70.0 | 61.5  | 0.006 ( 0.011)     | 28.8 | 89.9  | 0.009 (0.016)       |
| SM C26:1              | Excluded | 91.0 | 75.1  | 0.003 ( 0.004)     | 76.6 | 67.8  | 0.004 (0.006)       |
| <b>Hexoses</b>        |          |      |       |                    |      |       |                     |
| H1                    | Used     | 0.1  | 16.1  | 823.026 ( 961.181) | 2.0  | 8.0   | 1344.560 (5852.640) |

**Table S2. Results of 15 metabolites significantly altered by night shift work in combined and chronotype-stratified analysis based on creatinine-normalized values in the basic model**

Shown are the results for the  $\beta$ -estimate, the 95% confidence interval (CI) and false discovery rate (FDR) of the basic LMEM for the comparison of day shift (reference) and night. The basic model was adjusted for chronotype and batch effect; Significant *P*-values (FDR < 0.05) in both the basic and full LMEM model are indicated in bold. N = Number of nurses; n = Number of samples.

| Metabolites | Combined analysis<br>N = 68; n = 424 |                | Early chronotype<br>N = 16; n=91 |                    | Intermediate<br>chronotype<br>N = 22; n = 141 |                | Late chronotype<br>N = 30; n = 192 |                |
|-------------|--------------------------------------|----------------|----------------------------------|--------------------|-----------------------------------------------|----------------|------------------------------------|----------------|
|             | $\beta$ -Estimate (95%<br>CI)        | FDR<br>p-value | $\beta$ -Estimate<br>(95% CI)    | FDR<br>p-<br>value | $\beta$ -Estimate<br>(95% CI)                 | FDR<br>p-value | $\beta$ -Estimate (95%<br>CI)      | FDR<br>p-value |
| C5          | 0.07 (0.01, 0.12)                    | <b>5.0E-2</b>  | 0.22 (0.10, 0.35)                | <b>2.6E-3</b>      | -0.03 (-0.13, 0.07)                           | 8.2E-1         | 0.09 (0.00, 0.17)                  | 1.8E-1         |
| C7-DC       | 0.20 (0.09, 0.31)                    | <b>2.3E-3</b>  | 0.55 (0.30, 0.80)                | <b>7.8E-4</b>      | 0.05 (-0.15, 0.25)                            | 8.7E-1         | 0.14 (-0.02, 0.29)                 | 2.6E-1         |
| C8          | 0.13 (0.03, 0.23)                    | <b>2.9E-2</b>  | 0.50 (0.27, 0.74)                | <b>8.1E-4</b>      | -0.07 (-0.26, 0.12)                           | 7.6E-1         | 0.14 (0.00, 0.27)                  | 1.8E-1         |
| C10         | 0.16 (0.06, 0.26)                    | <b>8.9E-3</b>  | 0.51 (0.25, 0.78)                | <b>1.3E-3</b>      | -0.01 (-0.19, 0.18)                           | 9.6E-1         | 0.14 (0.01, 0.26)                  | 1.5E-1         |
| C10:2       | -0.38 (-0.53, -0.22)                 | <b>3.1E-5</b>  | -0.35 (-0.73, 0.04)              | 1.4E-1             | -0.21 (-0.44, 0.01)                           | 3.8E-1         | -0.45 (-0.68, -0.21)               | <b>3.7E-3</b>  |
| C12         | 0.26 (0.15, 0.38)                    | <b>7.1E-5</b>  | 0.62 (0.35, 0.90)                | <b>7.8E-4</b>      | 0.11 (-0.12, 0.34)                            | 7.1E-1         | 0.21 (0.06, 0.35)                  | <b>4.9E-2</b>  |
| C14         | 0.14 (0.03, 0.24)                    | <b>4.2E-2</b>  | 0.47 (0.18, 0.76)                | <b>5.6E-3</b>      | 0.04 (-0.17, 0.24)                            | 8.9E-1         | 0.05 (-0.09, 0.18)                 | 7.8E-1         |
| C14:1       | 0.16 (0.06, 0.26)                    | <b>8.9E-3</b>  | 0.51 (0.26, 0.76)                | <b>8.1E-4</b>      | 0.10 (-0.09, 0.28)                            | 7.1E-1         | 0.03 (-0.09, 0.16)                 | 8.2E-1         |
| C14:1-OH    | 0.18 (0.07, 0.30)                    | <b>8.9E-3</b>  | 0.55 (0.26, 0.85)                | <b>1.8E-3</b>      | 0.11 (-0.11, 0.33)                            | 7.1E-1         | 0.05 (-0.09, 0.19)                 | 7.8E-1         |
| C14:2       | 0.16 (0.06, 0.26)                    | <b>1.1E-2</b>  | 0.48 (0.20, 0.76)                | <b>3.5E-3</b>      | 0.07 (-0.12, 0.26)                            | 7.6E-1         | 0.08 (-0.05, 0.21)                 | 5.4E-1         |
| C14:2-OH    | 0.15 (0.04, 0.26)                    | <b>2.6E-2</b>  | 0.50 (0.21, 0.79)                | <b>3.5E-3</b>      | 0.05 (-0.16, 0.25)                            | 8.7E-1         | 0.03 (-0.10, 0.17)                 | 8.2E-1         |
| Gly         | 0.15 (0.04, 0.25)                    | <b>2.6E-2</b>  | -0.13 (-0.36, 0.10)              | 3.9E-1             | 0.22 (0.04, 0.40)                             | 1.6E-1         | 0.21 (0.04, 0.38)                  | 9.5E-2         |
| Phe         | 0.34 (0.21, 0.46)                    | <b>5.9E-6</b>  | 0.35 (0.04, 0.66)                | 5.9E-2             | 0.37 (0.14, 0.59)                             | 6.5E-2         | 0.34 (0.16, 0.51)                  | <b>3.7E-3</b>  |
| Ser         | 0.16 (0.04, 0.27)                    | <b>2.6E-2</b>  | 0.02 (-0.22, 0.27)               | 8.7E-1             | 0.21 (0.02, 0.40)                             | 2.7E-1         | 0.18 (0.00, 0.36)                  | 1.8E-1         |
| SM C24:0    | 0.20 (0.12, 0.29)                    | <b>4.3E-5</b>  | 0.42 (0.19, 0.66)                | <b>2.6E-3</b>      | 0.12 (-0.05, 0.28)                            | 5.1E-1         | 0.19 (0.09, 0.29)                  | <b>3.7E-3</b>  |
